RESEARCH ARTICLE

# Preliminary Proteomic Analysis of A549 Cells Infected with Avian Influenza Virus H7N9 and Influenza A Virus H1N1

Xiaoman Ding<sup>1</sup>, Jiahai Lu<sup>1</sup>, Ruoxi Yu<sup>2</sup>, Xin Wang<sup>3</sup>, Ting Wang<sup>4</sup>, Fangyuan Dong<sup>3</sup>, Bo Peng<sup>3</sup>, Weihua Wu<sup>3</sup>, Hui Liu<sup>3</sup>, Yijie Geng<sup>3</sup>, Renli Zhang<sup>3</sup>, Hanwu Ma<sup>3</sup>, Jinquan Cheng<sup>3</sup>, Muhua Yu<sup>4\*</sup>, Shisong Fang<sup>3\*</sup>

**1** School of Public Health, Sun Yat-sen University, Guangzhou, China, **2** Southern Medical University, Guangzhou, China, **3** Major Infectious Disease Control Key Laboratory, Key Reference Laboratory of Pathogen and Biosafety, Shenzhen Center for Disease Control and Prevention, Shenzhen, China, **4** Nanshan Center for Disease Control and Prevention, Shenzhen, China

\* [1175461964@qq.com](mailto:1175461964@qq.com) (MHY); [szcdcssf@aliyun.com](mailto:szcdcssf@aliyun.com) (SSF)

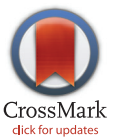

**OPEN ACCESS**

**Citation:** Ding X, Lu J, Yu R, Wang X, Wang T, Dong F, et al. (2016) Preliminary Proteomic Analysis of A549 Cells Infected with Avian Influenza Virus H7N9 and Influenza A Virus H1N1. PLoS ONE 11(5): e0156017. doi:10.1371/journal.pone.0156017

**Editor:** Suryaprakash Sambhara, Centers for Disease Control and Prevention, UNITED STATES

**Received:** January 1, 2016

**Accepted:** May 9, 2016

**Published:** May 25, 2016

**Copyright:** © 2016 Ding et al. This is an open access article distributed under the terms of the [Creative Commons Attribution License](https://creativecommons.org/licenses/by/4.0/), which permits unrestricted use, distribution, and reproduction in any medium, provided the original author and source are credited.

**Data Availability Statement:** All relevant data are within the paper.

**Funding:** This study was supported by a grant from Shenzhen Science and Technology Innovation Project (JCYJ20140416095154398 & JCYJ20140410164811662) to MHY and SSF. The funders of MHY had a role in study design and the funders of SSF had a role in preparation of the manuscript.

**Competing Interests:** The authors have declared that no competing interests exist.

## Abstract

A newly emerged H7N9 influenza virus poses high risk to human beings. However, the pathogenic mechanism of the virus remains unclear. The temporal response of primary human alveolar adenocarcinoma epithelial cells (A549) infected with H7N9 influenza virus and H1N1 influenza A virus (H1N1, pdm09) were evaluated using the proteomics approaches (2D-DIGE combined with MALDI-TOF-MS/MS) at 24, 48 and 72 hours post of the infection (hpi). There were 11, 12 and 33 proteins with significant different expressions ( $P < 0.05$ ) at 24, 48 and 72hpi, especially F-actin-capping protein subunit alpha-1 (CAPZA1), Ornithine aminotransferase (OAT), Poly(rC)-binding protein 1 (PCBP1), Eukaryotic translation initiation factor 5A-1 (EIF5A) and Platelet-activating factor acetylhydrolaseIb subunit beta (PAFAH1B2) were validated by western-blot analysis. The functional analysis revealed that the differential proteins in A549 cells involved in regulating cytopathic effect. Among them, the down-regulation of CAPZA1, OAT, PCBP1, EIF5A are related to the death of cells infected by H7N9 influenza virus. This is the first time show that the down-regulation of PAFAH1B2 is related to the later clinical symptoms of patients infected by H7N9 influenza virus. These findings may improve our understanding of pathogenic mechanism of H7N9 influenza virus in proteomics.

## Introduction

Since March 2013, A novel H7N9 influenza virus first crossed the species barrier and infected humans in East China, causing disease with unusually high morbidity and mortality. It is a reassortant virus which consists of the gene fragments from earlier H7N9, H7N3 and H9N2 viruses [1–3]. Human infection can be caused by the direct contact with the poultry infected with H7N9, since most of infected persons have ever exposed to the live poultry [4]. The patients had common symptoms during the early stage and later suffered from severe clinical outcomes including severe pneumonia, acute respiratory distress syndrome (ARDS), multi-organ dysfunction and encephalopathy [1,5–7].

In recent years, many new discoveries have been made concerning H7N9 infection. Sakai et al [8] demonstrated that recently emerged H7N9 as well as seasonal IAVs mainly used the specific protease TMPRSS2 for HA cleavage in vivo. Viruses H5N1, H7N7, and H7N9 were pathogenic in mice, Morrison et al [9] found that this pathogenicity was correlated with increased transcription of cytokine response genes and decreased transcription of lipid metabolism and coagulation signaling genes. To the best of our knowledge, few proteome analyses have been reported comparing the differences in the cellular host response between H7N9 and H1N1pdm09 viruses at the proteomic level, especially in the whole process of infection. It is clear that the pandemic of the H1N1pdm09 is relatively mild. Unlike the H1N1pdm09, the H7N9 influenza virus has never been extensively circulated among the humans, so the lacking of preexisting immunity presents the human population at high risk [10,11]. Noteworthy, our previous studies [12] and available data [13–15] suggested that the H1N1 infection induced less of a response. There was no obvious protein profile changes of cells including A549 cells infected with H1N1 virus. In addition, A549 cells are widely used for the investigation of influenza A virus replication in vitro or in other proteome studies. The avian influenza virus generally prefer  $\alpha$ -2,3 sialic acid receptors. The H7N9 virus can invade the lower respiratory tract of human beings because the virus retain strong affinity for the  $\alpha$ -2,3 sialic acid receptors present in the lower respiratory tract of human [16,17]. Notably, the virus titre in lung tissues was about tenfold higher than that in tracheal tissues [11]. Therefore, We selected H1N1 pdm09-infected A549 cells as the control group in this study. The fluorescent two dimensional difference gel electrophoresis (2D-DIGE) and MALDI-TOF-MS/MS were applied to investigate the difference in host proteome after infection with the two influenza virus strains and explored the underlying pathogenic mechanism of H7N9 infection in mammals.

## Materials and Methods

### Ethics statement

All procedures performed in studies were in accordance with the ethical standards of the institutional and/or national research committee and with the Helsinki declaration and were approved by the Medical Ethics Committee of Shenzhen Center for Disease Control and Prevention (SZCDC), Shenzhen, P. R. China.

### Reagents

A549 cell line, H7N9 and H1N1pdm09 influenza virus were obtained from Shenzhen Center for Disease Control and Prevention (SZCDC). All the reagents for DIGE were purchased from GE Healthcare (Pittsburgh, PA, USA). DL-Dithiothreitol (DTT), Iodoacetamide (IAA), CHAPS were purchased from Sigma-Aldrich (Louis, MO, USA). The antibodies against CAPZA1, OAT, PCBP1, EIF5A, PAFAH1B2 were purchased from Abcam (Cambridge, MA, USA). The antibody against  $\beta$ -action was purchased from Santa Cruz (Santa Cruz, CA, USA). The secondary antibodies of goat anti-mouse and goat anti-rabbit were purchased from Thermo Fisher (Rockford, IL, USA). The restriction enzyme (BamH I and Not I) were purchased from NEB(USA).

Lipofectamine2000 and pcDNA3.1/Neo(+) were purchased from Invitrogen (Carlsbad, CA, USA).

### Cell culture and virus infection

A549 cells were cultured in Dulbecco's modified Eagle's medium (DMEM) supplemented with 10% fetal bovine serum (FBS) and incubated at 37°C under 5% CO<sub>2</sub>. To ensure most of the

cells were able to grow adhering to the wall at 72hpi, a multiplicity of infection (MOI) of 0.001 was used [18]. Cells were infected with H7N9 or H1N1pdm09 influenza virus in independent biological triplicates and the cell culture supernatants including 0.25 $\mu$ g/mL of trypsin. All experiments with H7N9 influenza virus were performed in enhanced biosafety level 3 (BSL3) containment laboratories at SZCDC.

## Protein extraction, quantification and labeling

At set time points post-infection (24, 48, and 72h), medium was aspirated, cells were washed three times by PBS and then lysed on ice with lysis buffer (7M urea, 2M thiourea, 30mM Tris-HCl PH 8.8, 4% w/v CHAPS) for 30min. All the cells were then scraped into a 1.5mL eppendorf centrifuge tube and sonicated for 30s, centrifuged at 14,000 $\times$ g for 60 min at 4°C. Purification and quantification of the proteins were performed strictly according to the instruction of 2-D Clean-Up Kit and 2-D Quant Kit (GE healthcare).

The biological replicates at set time points were labeled and reversely labeled by 200pmol Cy3 and Cy5 fluorescence dyes from CyDye DIGE Fluor Minimal Labeling Kit (GE healthcare), respectively. A total of 25 $\mu$ g of all individual samples were pooled as internal standard and labeled by 200pmol Cy2 dye. The labeling reaction was carried out on ice in darkness for 30 min and then quenched with 1 $\mu$ L of 10 mM lysine for 10 min. For each gel, Cy2-, Cy3-, and Cy5-labeled proteins (25 $\mu$ g each) were combined and an equal volume of 2 $\times$ sample buffer (7M urea, 2M thiourea, 4% w/v CHAPS, 2% w/v DTT, 2% v/v IPG buffer pH 3–11) was added, then brought the total volume of the sample to 450 $\mu$ L with rehydration buffer (8M urea, 2% w/v CHAPS, 0.5% v/v IPG buffer pH 3–11, 0.5% w/v DTT, 0.002% w/v bromophenol blue).

## 2-D electrophoresis

Isoelectric focusing (IEF) was carried out using the Ettan IPGphor focusing apparatus (GE Healthcare) and the extracted proteins were loaded onto 24cm, 3-11NL immobilized pH gradient (IPG) strips (GE healthcare). The IEF procedure was as follows: 50V 18h, 300V 2h, 500V 2h, 1000V 2h, gradient 8000V 8h, 8000V 8h. After IEF, the IPG strips were incubated in equilibration buffer (6M urea, 75mM Tris-HCl PH 8.8, 29.3% v/v glycerol, 2% w/v SDS, 0.002% w/v bromophenol blue) supplemented with 1% w/v DTT for 15min. This step was repeated using the same buffer with 2.5% w/v IAA in place of 1% DTT. The strips were then put on the top of 12.5% SDS-PAGE gels with 1W per gel for 1h and 11W per gel for about 6h at 15°C.

## Gel image acquisition and analysis

After 2-D electrophoresis, the gel images for analysis were obtained by using the Typhoon TRIO Imager (GE Healthcare) and were processed in DeCyder 6.5 differential analysis software (GE Healthcare). To assess the biological variation, three individual infection experiments were carried out at three time points and three gel replicates were used for inter-gel matching performed with the Biological Variation Analysis (BVA) software module. These proteins were found to be different expressed between H7N9- and H1N1pdm09-infected A549 cells using a Student's t-test. Protein spots with significant differences in abundance (H7N9/H1N1 over 1.5-folds,  $P < 0.05$ ) were selected for mass spectrometry.

## Protein identification by in-gel-digestion and MALDI-TOF-MS/MS

Interested protein spots from the Coomassie-stained gels were manually excised. The gel samples were placed in a 1.5mL eppendorf centrifuge tube and washed twice with 500 $\mu$ L ddH<sub>2</sub>O. The gel pieces were destained and dehydrated, and then digested using sequencing-grade

trypsin (Promega, Madison, WI, USA) overnight at 37°C. The resulting peptides were then analyzed by an Ultrafle Xtreme MALDI-TOF/TOF Mass Spectrometer (Bruker Daltonics Inc, Billerica, MA, USA). The peptide mass fingerprint (PMF) combined MS/MS data were submitted to MASCOT version 2.2 (Matrix Science, Boston, MA, USA) for identification according to the SwissProt database. The parameters were set as follows: Homo sapiens, trypsin cleavage, missed cleavage, carbamidomethylation as a fixed modification, methionine oxidation as a variable modification, peptide mass tolerance set at 100ppm, and fragment tolerance set at 0.5Da. Proteins matching more than two peptides and protein scores > 30 were considered statistically significant ( $P < 0.05$ ).

## Bioinformatics analysis

Protein ontology classification was performed with PANTHER classification system (<http://www.pantherdb.org/>) by importing into the accession of the proteins. The differentially expressed proteins at 24, 48, 72hpi were grouped according to their protein classes.

The String software (<http://string-db.org/>) was utilized to perform a protein-protein interaction network for the differentially expressed proteins at 24, 48, 72hpi by searching the String database and the protein-protein interaction network database.

## Western blot analysis

The proteins from A549 cells infected with H7N9 and H1N1pdm09 influenza virus at 24, 48, 72hpi as well as time-matched mock-infected cells were extracted and quantified using a BCA assay (Thermo Fisher Scientific). Total proteins were separated by one-dimensional SDS-PAGE and transferred to PVDF membranes. Membranes were blocked with 5% (w/v) nonfat dry milk in TBST and subsequently incubated overnight at 4°C with the corresponding primary antibodies anti- $\beta$ -action (1:1000), anti-CAPZA1 (1:10000), anti-OAT (1:1000), anti-PCBP1 (1:1000), anti-EIF5A (1:5000), anti-PAFAH1B2 (1:1000). After three washes with TBST, membranes were incubated for 90 min at room temperature with horseradish peroxidase labeled secondary antibodies (1:5000). Membranes were then washed thoroughly with TBST, scanned using Image Quant LAS4000 (GE healthcare), and analyzed quantitatively.

## The expression of PAFAH1B2 in H7N9 infection

The Genbank accession number of PAFAH1B2 is CR456736 and the cDNA (690bp) was synthesized artificially. The PCR primers (sense:5'-GCGGGATCCAT GAGCCAAGGAGACT CAAACCCA-3'; antisense:5'-GCGGCGGCCGCTTAAGCA ATGGTGGTTTGTCTCTCC-3') based on this fragment were synthesized. We created the PAFAH1B2 cDNA by PCR amplification with primers containing a 5'BamHI restriction site and a 3'NotI restriction site for subcloning into pcDNA3.1/Neo(+) via BamH I and Not I, which created the final vector, pcDNA3.1/Neo-PAFAH1B2. The sequences of all clones were verified by sequence analysis [19–20].

Lipofectamine2000 was employed for the transient transfections of the recombinant eukaryotic expressing plasmids pcDNA3.1/Neo-PAFAH1B2 in A549 cells. At 24 hours post of transfection, the A549 cells with recombinant plasmid were infected by H7N9 influenza virus and observed the levels of PAFAH1B2 at 24,48 and 72hpi by western blot analysis. Besides, the levels of PAFAH1B2 in primary A549 cells and cells with recombinant plasmid were also analyzed by western blot.

## Results

### 2-D DIGE screening and identification of differentially expressed proteins

DIGE analysis (Fig 1) the differentially expressed spots (Students t-test  $P < 0.05$ ). The significantly up- or down-regulated proteins by at least 1.5-folds were subject to the further analysis by MALDI-TOF-MS/MS identification unambiguously. A total of 11,12,33 protein spots were found to be differentially expressed in A549 cells infected with H7N9 and H1N1pdm09 influenza virus at 24, 48, 72hpi, respectively (Tables 1, 2 and 3), especially F-actin-capping protein subunit alpha-1 (CAPZA1), Ornithine aminotransferase (OAT), Poly(rC)-binding protein 1 (PCBP1), Eukaryotic translation initiation factor 5A-1 (EIF5A) and Platelet-activating factor acetylhydrolaseIb subunit beta (PAFAH1B2). The data showed that the up- or downregulated of these five proteins were associated with the time of infection by the two strains.

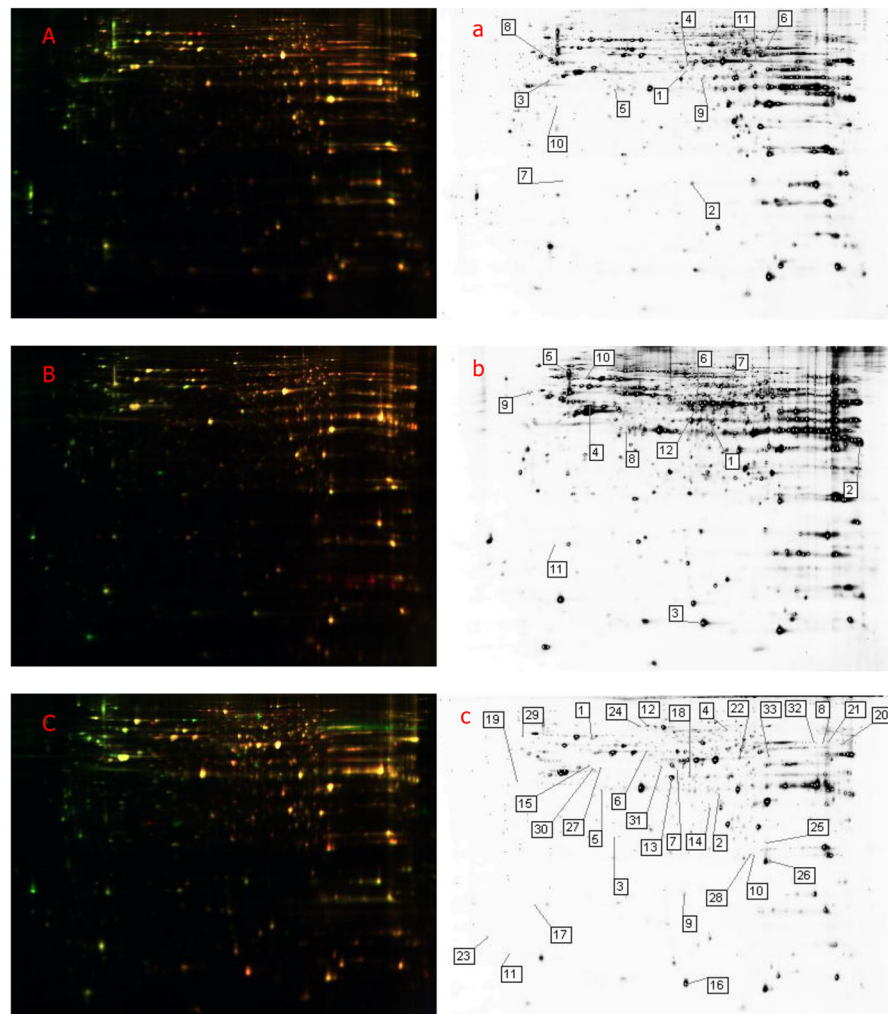

**Fig 1. 2D- DIGE images and differentially expressed proteins of H7N9- and H1N1pdm09-infected A549 cells.** The 2D- DIGE images of A549 cells infected with H7N9 and H1N1pdm09 influenza virus at 24 (A), 48 (B) and 72 (C) hpi. 2D- DIGE analysis of the differentially expressed spots between H7N9- and H1N1pdm09-infected A549 cells at 24 (a), 48 (b) and 72(c) hpi.

doi:10.1371/journal.pone.0156017.g001



**Table 1. Identification of differentially expressed proteins in A549 cells infected with H7N9 and H1N1pdm09 influenza virus at 24hpi.**

| Spots No. | Names                                               | Accession   | Score | MW(kDa)/PI | AV.ratio (H7N9/H1N1) | P value(T-test) |
|-----------|-----------------------------------------------------|-------------|-------|------------|----------------------|-----------------|
| *1        | Ornithine aminotransferase                          | OAT_HUMAN   | 185   | 48846/6.6  | -2.04                | 0.00054         |
| 2         | Cofilin-1                                           | COF1_HUMAN  | 273   | 18719/9.1  | 1.72                 | 0.00055         |
| 3         | Serine-threonine kinase receptor-associated protein | STRAP_HUMAN | 248   | 38756/4.8  | -2.14                | 0.0021          |
| 4         | Annexin A7                                          | ANXA7_HUMAN | 118   | 52991/5.4  | -1.56                | 0.0038          |
| *5        | F-actin-capping protein subunit alpha-1             | CAZA1_HUMAN | 98    | 33073/5.4  | -2.3                 | 0.0042          |
| 6         | Retinal dehydrogenase 1                             | AL1A1_HUMAN | 165   | 55454/6.3  | 1.64                 | 0.0081          |
| 7         | Eukaryotic translation initiation factor 1A         | IF1AX_HUMAN | 244   | 16564/4.9  | -2.13                | 0.011           |
| 8         | Tubulin beta-2A chain                               | TBB2A_HUMAN | 346   | 50274/4.6  | -1.6                 | 0.018           |
| *9        | Poly(rC)-binding protein 1                          | PCBP1_HUMAN | 56    | 37987/6.8  | -2.13                | 0.021           |
| 10        | EF-hand domain-containing protein D2                | EFHD2_HUMAN | 381   | 26795/5.0  | -1.75                | 0.022           |
| 11        | Alpha-enolase                                       | ENOA_HUMAN  | 145   | 47481/7.7  | 1.63                 | 0.041           |

\* Indicating that the differential proteins were validated by western blot analysis.

doi:10.1371/journal.pone.0156017.t001

### Protein classes and protein interaction network diagram

The differentially expressed proteins in A549 cells infected with the two strains at 24, 48, 72hpi were imported into the PANTHER database. The PANTHER classification system revealed that the proteins could be classified into groups according to their protein classes. Most of the differential proteins at 24hpi belonged to nucleic acid binding (27.3%), cytoskeletal protein (27.3%), transferase (9.1%), lyase (9.1%), calcium-binding protein (9.1%), enzyme modulator (9.1%) and oxidoreductase (9.1%). More classes of the differential proteins (receptor, structural protein, transporter, chaperone, isomerase, hydrolase, extracellular matrix protein) were expressed in A549 cells in the later phase of infection (Fig 2).

The protein interaction network diagram was constructed for the differentially expressed proteins in A549 cells infected with the two virus strains at 24, 48, 72hpi. As shown in (Fig 3), the protein interaction network diagram became more and more complicated during the time of infection. The proteins CAPZA1, PCBP1, and EIF5A were located in the central area of the

**Table 2. Identification of differentially expressed proteins in A549 cells infected with H7N9 and H1N1pdm09 influenza virus at 48hpi.**

| Spots No. | Names                                             | Accession   | Score | MW(kDa)/PI | AV.ratio (H7N9/H1N1) | P value(T-test) |
|-----------|---------------------------------------------------|-------------|-------|------------|----------------------|-----------------|
| *1        | Poly(rC)-binding protein 1                        | PCBP1_HUMAN | 237   | 37987/6.8  | -1.82                | 0.00026         |
| 2         | Heterogeneous nuclear ribonucleoprotein A1        | ROA1_HUMAN  | 378   | 38837/9.6  | -1.57                | 0.0018          |
| 3         | U6 snRNA-associated Sm-like protein LSM2          | LSM2_HUMAN  | 97    | 10942/6.1  | 1.73                 | 0.0018          |
| 4         | Actin, cytoplasmic 1                              | ACTB_HUMAN  | 349   | 42052/5.2  | -1.72                | 0.0041          |
| 5         | Vimentin                                          | VIME_HUMAN  | 362   | 53676/4.9  | -2.6                 | 0.0047          |
| *6        | Ornithine aminotransferase                        | OAT_HUMAN   | 244   | 48846/6.6  | -2.09                | 0.0048          |
| 7         | Pyruvate kinase isozymes M1/M2                    | KPYM_HUMAN  | 171   | 58470/9.0  | -2.31                | 0.0049          |
| *8        | F-actin-capping protein subunit alpha-1           | CAZA1_HUMAN | 33    | 33073/5.4  | -3.26                | 0.0082          |
| 9         | UV excision repair protein RAD23 homolog B        | RD23B_HUMAN | 65    | 43202/4.6  | -4.33                | 0.0098          |
| 10        | Heat shock cognate 71 kDa protein                 | HSP7C_HUMAN | 183   | 71082/5.2  | -2                   | 0.01            |
| *11       | Eukaryotic translation initiation factor 5A-1     | IF5A1_HUMAN | 45    | 17049/4.9  | -4.5                 | 0.011           |
| 12        | Pyruvate dehydrogenase E1 component subunit alpha | ODPA_HUMAN  | 83    | 43952/9.3  | -2.64                | 0.012           |

\* Indicating that the differential proteins were validated by western blot analysis.

doi:10.1371/journal.pone.0156017.t002

**Table 3. Identification of differentially expressed proteins in A549 cells infected with H7N9 and H1N1pdm09 influenza virus at 72hpi.**

| Spots No. | Names                                                      | Accession   | Score | MW(kDa)/PI | AV.ratio (H7N9/H1N1) | P value(T-test) |
|-----------|------------------------------------------------------------|-------------|-------|------------|----------------------|-----------------|
| 1         | Heat shock 70 kDa protein 1A/1B                            | HSP71_HUMAN | 277   | 70294/5.4  | 2.45                 | 2.00E-05        |
| 2         | Heterogeneous nuclear ribonucleoprotein D-like             | HNRDL_HUMAN | 56    | 46580/10   | -2.57                | 3.60E-05        |
| *3        | Platelet-activating factor acetylhydrolase Ib subunit beta | PA1B2_HUMAN | 138   | 25724/5.5  | -15.52               | 9.80E-05        |
| 4         | Prelamin-A/C                                               | LMNA_HUMAN  | 150   | 74380/6.6  | 2.26                 | 0.00014         |
| *5        | F-actin-capping protein subunit alpha-1                    | CAZA1_HUMAN | 192   | 33073/5.4  | -4.27                | 0.00027         |
| 6         | Heterogeneous nuclear ribonucleoprotein H                  | HNRH1_HUMAN | 392   | 49484/5.9  | 1.66                 | 0.00028         |
| *7        | Ornithine aminotransferase                                 | OAT_HUMAN   | 38    | 48846/6.6  | -2.95                | 0.00029         |
| 8         | Peptidyl-prolyl cis-trans isomerase B                      | PPIB_HUMAN  | 50    | 23785/9.9  | -8.39                | 0.00065         |
| 9         | Cofilin-1                                                  | COF1_HUMAN  | 213   | 18719/9.1  | -1.6                 | 0.0008          |
| 10        | Transgelin-2                                               | TAGL2_HUMAN | 46    | 22548/9.3  | 1.97                 | 0.0018          |
| 11        | Transcription elongation factor B polypeptide 1            | ELOC_HUMAN  | 71    | 12636/4.6  | -3.53                | 0.0027          |
| 12        | Ezrin                                                      | EZRI_HUMAN  | 107   | 69484/5.9  | 1.59                 | 0.0028          |
| 13        | Macrophage-capping protein                                 | CAPG_HUMAN  | 155   | 38760/5.8  | 1.53                 | 0.0031          |
| 14        | Proteasome subunit alpha type-1                            | PSA1_HUMAN  | 230   | 29822/6.2  | 1.52                 | 0.0044          |
| 15        | Thioredoxin domain-containing protein 5                    | TXND5_HUMAN | 38    | 48283/5.6  | -2.25                | 0.0058          |
| 16        | U6 snRNA-associated Sm-like protein LSM2                   | LSM2_HUMAN  | 119   | 10942/6.1  | 1.93                 | 0.0058          |
| *17       | Eukaryotic translation initiation factor 5A-1              | IF5A1_HUMAN | 112   | 17049/4.9  | -5.96                | 0.0072          |
| *18       | Poly(rC)-binding protein 1                                 | PCBP1_HUMAN | 72    | 37987/6.8  | 1.72                 | 0.0078          |
| 19        | Nucleophosmin                                              | NPM_HUMAN   | 208   | 32726/4.5  | -3.33                | 0.0083          |
| 20        | ATP synthase subunit alpha                                 | ATPA_HUMAN  | 122   | 59828/9.6  | -2.61                | 0.0087          |
| 21        | Aconitate hydratase, mitochondrial                         | ACON_HUMAN  | 333   | 86113/7.9  | -3.57                | 0.0088          |
| 22        | Alpha-enolase                                              | ENOA_HUMAN  | 160   | 47481/7.7  | 1.97                 | 0.009           |
| 23        | Myosin light polypeptide 6                                 | MYL6_HUMAN  | 120   | 17090/4.4  | -3.29                | 0.0092          |
| 24        | Gelsolin                                                   | GELS_HUMAN  | 164   | 86043/5.9  | 1.6                  | 0.013           |
| 25        | Flavin reductase (NADPH)                                   | BLVRB_HUMAN | 41    | 22219/7.9  | 1.5                  | 0.014           |
| 26        | Phosphatidylethanolamine-binding protein 1                 | PEBP1_HUMAN | 209   | 21158/7.8  | 1.58                 | 0.016           |
| 27        | Actin, aortic smooth muscle                                | ACTA_HUMAN  | 51    | 42381/5.1  | 2.25                 | 0.019           |
| 28        | Superoxide dismutase [Mn]                                  | SODM_HUMAN  | 119   | 24878/9.1  | 4.23                 | 0.019           |
| 29        | Microfibrillar-associated protein 1                        | MFAP1_HUMAN | 65    | 51927/4.8  | -2.19                | 0.021           |
| 30        | Protein NDRG1                                              | NDRG1_HUMAN | 172   | 43264/5.4  | 1.69                 | 0.021           |
| 31        | TAR DNA-binding protein 43                                 | TADBP_HUMAN | 56    | 45053/5.8  | 1.61                 | 0.023           |
| 32        | Retinal dehydrogenase 1                                    | AL1A1_HUMAN | 95    | 55454/6.3  | -8.89                | 0.029           |
| 33        | Vasodilator-stimulated phosphoprotein                      | VASP_HUMAN  | 114   | 39976/9.7  | 1.68                 | 0.036           |

\* Indicating that the differential proteins were validated by western blot analysis.

doi:10.1371/journal.pone.0156017.t003

network. However, OAT and PAFAH1B2 were not included in the network, they also played a crucial role in the process of H7N9 infection.

### Validation of the differentially expressed proteins by western-blot analysis

In order to validate the data obtained from 2-D DIGE and MALDI-TOF-MS/MS, we performed western blots. In 3 independent western blot analyses ( $P < 0.05$ ), as shown in (Fig 4), compared with the H1N1pdm09 infection, the down- or up-regulated proteins of CAPZA1 (33KDa), OAT (49KDa), PCBP1 (37KDa), EIF5A (18KDa), PAFAH1B2 (26KDa) in H7N9

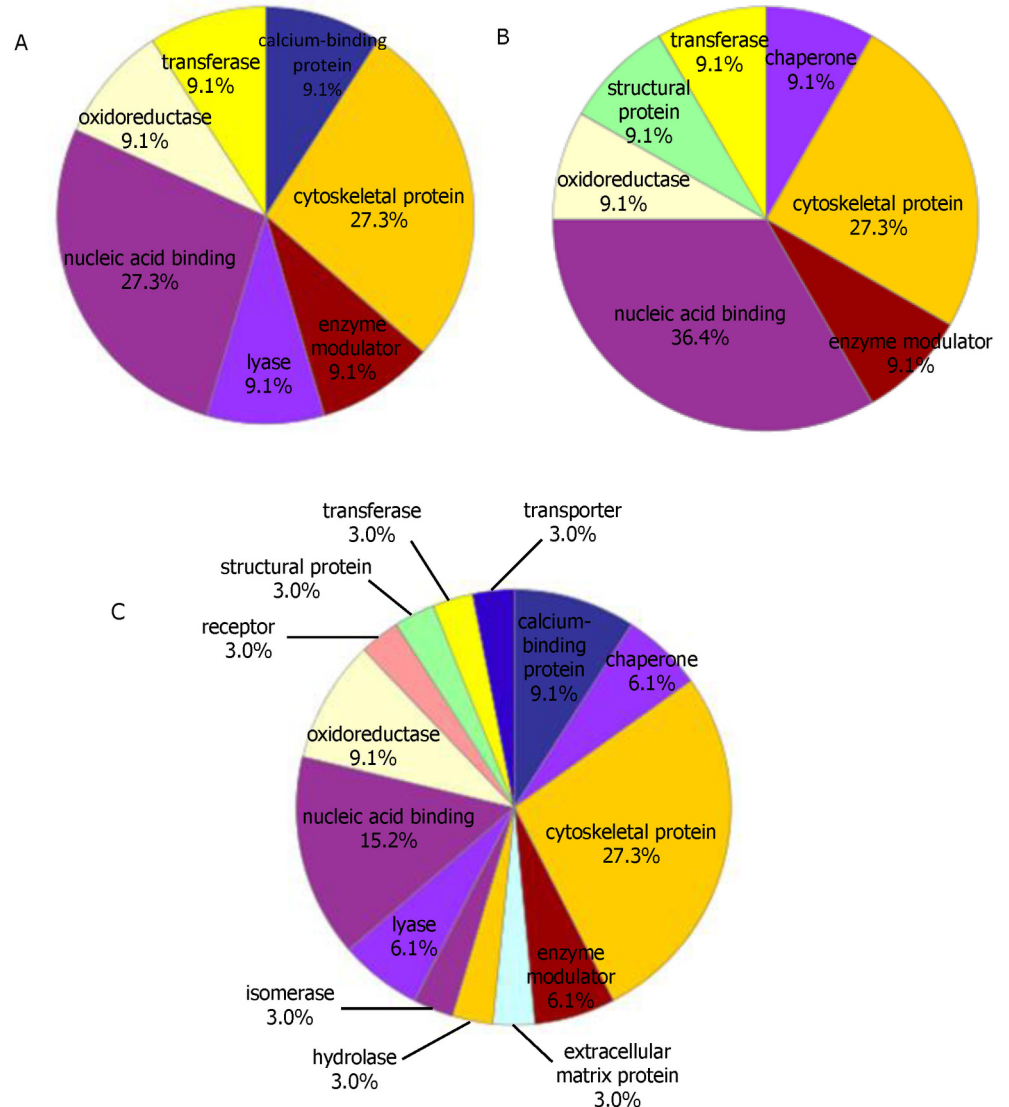

**Fig 2. Functional classifications of the identified proteins according to their protein classes of 24h (A), 48h (B) and 72h (C) by PANTHER.**

doi:10.1371/journal.pone.0156017.g002

infection were consistent with the 2-D DIGE results. Furthermore, the expression of these five proteins were not affected in the cells infected by H1N1pdm09 virus compared with the time-matched mock infection cells.

### Validate the expression of PAFAH1B2 in H7N9 infection by western-blot analysis

The A549 cells with over-expressing PAFAH1B2 were constructed successfully, as shown in (Fig 5A, 5B, 5D, 5E, 5G and 5H). The levels of PAFAH1B2 in A549 cells with recombinant plasmid were about twice than the primary A549 cells. We also observed that the levels of PAFAH1B2 in H7N9-infected A549 cells with recombinant plasmid were not down-regulated obviously until 72hpi compared with the non-infected A549 cells with recombinant plasmid (Fig 5B, 5C, 5E, 5F, 5H and 5I). The results further prove that the H7N9 virus seriously affect the synthesis of PAFAH1B2 in A549 cells in the later phase of infection.



### Discussion

Our proteomic analysis revealed that the intracellular proteins were differentially translated in H7N9- and H1N1pdm09-infected A549 cells at 24, 48, 72hpi. The prominent response was marked by the change in abundance of CAPZA1, OAT, PCBP1, EIF5A and PAFAH1B2.

F-actin capping protein (CapZ) is an  $\alpha\beta$  heterodimer that binds and “caps” the barbed end of actin filaments in a reversible and calcium-independent manner to limit growth of the actin filament at this end. It is a key regulator of action polymerization in a wide variety of tissues and organisms [21–23]. Therefore, a down-regulation of CapZ *in vivo* would allow the actin filaments to keep growing and result in the accumulation of actin filaments, which could alter regulation of a number of actin-binding activities as well as interfering with directed cell movement, cell polarity and signaling events. It would cause the cells to break apart and undergo lysis ultimately [24,25]. In comparison to H1N1pdm09-infected A549 cells, the expression of CAPZA1 (CapZ- $\alpha$ 1), one of a subunit isoforms of CapZ [23], was down-regulated in H7N9-infected A549 cells at 24, 48 and 72hpi, which indicated that the H7N9 virus could seriously affect the synthesis of CAPZA1 in A549 cells.

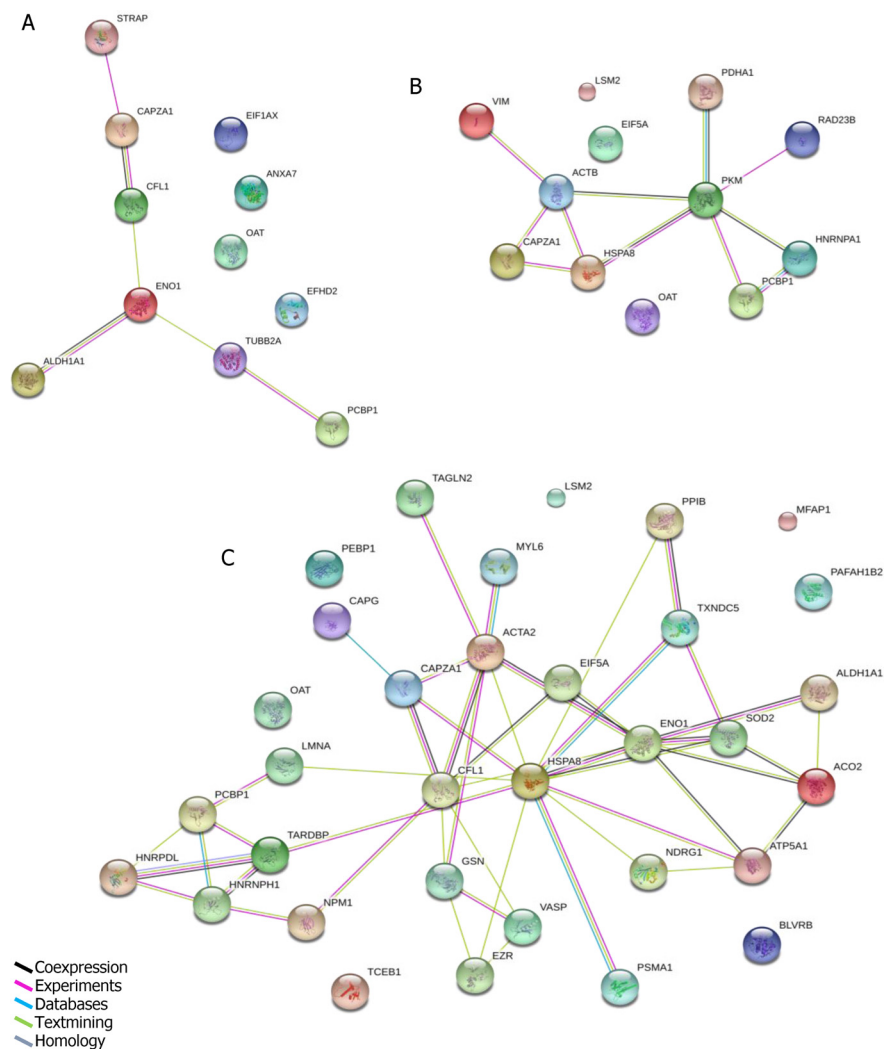

**Fig 3. The protein interaction network diagrams of 24h(A), 48h(B) and 72h(C) were analyzed by String software. Colored lines denote interactions.**

doi:10.1371/journal.pone.0156017.g003

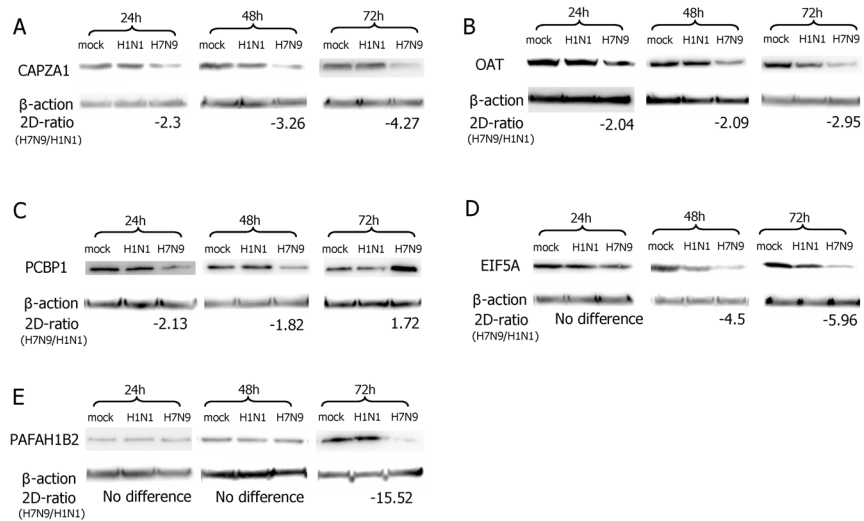

**Fig 4. Results of western blot analysis.** The differentially expressed proteins of CAPZA1 (A), OAT (B), PCBP1 (C), EIF5A (D), PAFAH1B2 (E) in H7N9- and H1N1pdm09-infected A549 cells at 24, 48 and 72hpi as well as time-matched mock-infected cells were confirmed by western blot analysis.

doi:10.1371/journal.pone.0156017.g004

Ornithine- $\delta$ -aminotransferase (OAT) is a nuclear encoded, pyridoxal-5'-phosphate (PLP)-dependent enzyme, found in the mitochondrial matrix of most human tissues [26,27]. It involves in the synthesis of glutamate from ornithine, and further synthesizes proline and glutamine, as well as regulating the levels of ornithine in the cells [28–30]. The formation of these products from ornithine is of great physiological importance for diverse functions, such as growth, development, and response to a wide range of signaling molecules [31]. Wang et al [32] found that OAT has played a crucial role in regulating mitotic cell division. The decrease of OAT could block cell division and lead to cell death. Compared with the H1N1pdm09 infection, the down-regulation of OAT in H7N9-infected A549 cells at 24, 48 and 72hpi maybe block cell division and cause cell death.

Poly(rC)-binding protein 1 (PCBP1) is a member of the hnRNP family, which contains three K-Homology (KH) domains and two nuclear localization signals [33,34]. It is a RNA-

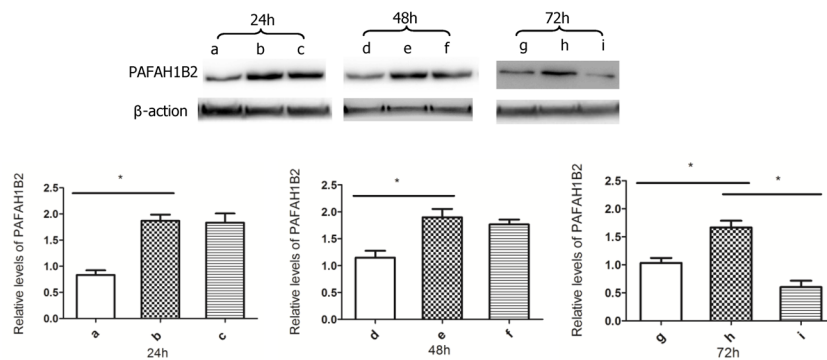

**Fig 5. The expression of PAFAH1B2 in H7N9 infection.** The a, d and g were the relative levels of PAFAH1B2 in primary A549 cells. The b, e and h were the relative levels of PAFAH1B2 in A549 cells with recombinant plasmid. The c, f and i were the relative levels of PAFAH1B2 in A549 cells with recombinant plasmid infected by H7N9 virus at 24,48 and 72hpi. The data are shown the relative levels of PAFAH1B2 with SD (n = 3, \*p<0.05).

doi:10.1371/journal.pone.0156017.g005

binding and DNA-binding protein, as well as regulating transcriptional and translational processes [35]. It also involves in messenger RNA (mRNA) shuttling between the cytoplasm and nucleus, mRNA stability, protein-protein interactions and so on [36]. Huo et al [37] found that five pathways were recognized as being significantly impacted by the overexpression of exogenous PCBP1, including the translation factors pathway, hypertrophy model pathway, cell cycle pathway, integrin-mediated cell adhesion pathway and apoptosis mechanism pathway. Furthermore, they found that PCBP1 was a positive regulator for the cell cycle and anti-apoptosis. We observed that the levels of PCBP1 in H7N9-infected A549 cells were down-regulated at 24h and 48h as compared to the H1N1pdm09 infection, which inhibited cell cycle and induced apoptosis.

Eukaryotic translation initiation factor 5A (EIF5A), a nucleocytoplasmic shuttle protein, is the only protein containing hypusine [Ne-(4-amino-2-hydroxybutyl)lysine], which is essential for EIF5A function [38]. The protein is related to eukaryotic translation [39], cell viability [40] and cell proliferation [41]. Maier et al [42] identified EIF5A as a critical regulator of the inflammatory response. Notably, EIF5A is a major factor that controls the balance between cell proliferation and death. Moreover, the depletion of EIF5A would exert strong antiproliferative effects in mammalian cells, leading to the inhibition of cell proliferation by arresting the cell cycle at the G1/S boundary [43,44]. In the present study, we found that EIF5A was prominently down-regulated at 48h and 72h in H7N9-infected A549 cells.

Platelet-activating factor acetylhydrolase (PAFAH) can inactivate the potent pro-inflammatory phospholipid platelet-activating factor (PAF) by removing the acetyl group at its sn-2 position. This family of enzymes is comprised of one secreted (plasma) and at least four intracellular isozymes (isoforms Ia, Ib, II, erythrocyte form) [45,46]. Isoform Ib is a G-protein-like complex with two catalytic subunits ( $\alpha 1$  and  $\alpha 2$ ) and a regulatory  $\beta$  subunit, which inactivates PAF during its formation, and thus controls the secretion of active PAF and also acts by inhibiting intracellular functions of PAF [47–49]. The PAF mediates an array of biological processes (fertilization, fetal development, blood pressure). It also appears to be involved in pathological processes (inflammation, allergies, neural disorders, asthma, and chronic obstructive pulmonary disease) that affects the cardiovascular, cerebral, respiratory, gastrointestinal systems. It is worth noting that the PAF can stimulate the host to produce inflammatory cytokines, induce platelet aggregation and vascular permeability [45,50].

Our study showed platelet-activating factor acetylhydrolaseIb subunit beta (PAFAH1B2) to be significantly down-regulated at 72h in H7N9-infected A549 cells. The level of PAF would be up-regulated, which was related to the later clinical symptoms of patients infected with H7N9 virus, such as pneumonia, ARDS, encephalopathy and so on. Moreover, the increase of PAF induces large amounts of platelets to aggregation which can produce a wide range of micro thrombus in the host. It may be the reason that the patients infected with H7N9 virus exhibit thrombocytopenia and coagulopathy [5]. In addition, the up-regulation of PAF is also consistent with previous findings showing that acute-phase serum samples from H7N9-infected patients contain elevated levels of inflammatory cytokines and induce vascular permeability [6,9,11].

We utilized proteomic approaches to identify differential expressions of cellular proteins in A549 cells infected with H7N9 and H1N1pdm09 influenza virus at 24, 48, 72hpi. It suggests that these differentially expressed proteins are involved in the pathogenic mechanisms of H7N9 infection at the cellular level. A study by Simon et al [15] infected A549 human cells with seasonal H1N1 (sH1N1), H1N1pdm09, or H7N9 and HPAI H5N1 strains (MOI of 10) to measure proteomic host responses to these different strains at the early stage of 1, 3, and 6hpi. However, their study showed that PCBP1 and EIF5A were up-regulated in A549 cells infected by the H7N9 virus and were not affected in the cells infected by H1N1pdm09 virus at 6hpi.

These may be the cells' stress response at the early stage of H7N9 infection in order to keep cell viability and anti-apoptosis. Morrison et al[9] considered that the depression of coagulation factor transcription in the lungs of mice infected with H7N9 virus was the reason of infection-induced vascular permeability and coagulopathy. While the decreasing of PAFAH1B2 in H7N9 infection maybe another reason of infection-induced vascular permeability and coagulopathy in our study. We first find that the expression of PAFAH1B2 is down-regulated significantly in H7N9 infection, which may provide a new therapeutic direction for the patients infected by H7N9 influenza virus. We will carry out further research to elucidate the mechanisms of PAFAH1B2 in H7N9 infection.

## Acknowledgments

The authors would like to thank Jianjun Liu for the excellent technical support of 2D-DIGE.

## Author Contributions

Conceived and designed the experiments: MHY TW RXY. Performed the experiments: XMD TW FYD. Analyzed the data: XMD JHL RLZ HWM JQC. Contributed reagents/materials/analysis tools: BP WHW HL YJG. Wrote the paper: XMD JHL XW SSF.

## References

1. Wu Y, Shen L, Ding Y, Tanaka Y, Zhang W. Preliminary success in the characterization and management of a sudden breakout of a novel H7N9 influenza A virus. *Int J Biol Sci.*2014; 10(1): 109–18. doi: [10.7150/ijbs.8198](https://doi.org/10.7150/ijbs.8198) PMID: [24520209](https://pubmed.ncbi.nlm.nih.gov/24520209/).
2. Van Ranst M, Lemey P. Genesis of avian-origin H7N9 influenza A viruses. *Lancet.* 2013; 381(9881): 1883–5. doi: [10.1016/S0140-6736\(13\)60959-9](https://doi.org/10.1016/S0140-6736(13)60959-9) PMID: [23643449](https://pubmed.ncbi.nlm.nih.gov/23643449/).
3. Hai R, Schmolke M, Leyva-Grado VH, Thangavel RR, Margine I, Jaffe EL, et al. Influenza A(H7N9) virus gains neuraminidase inhibitor resistance without loss of in vivo virulence or transmissibility. *Nat Comms.* 2013; 4: 2854. doi: [10.1038/nco\\_mms3854](https://doi.org/10.1038/nco_mms3854) PMID: [24326875](https://pubmed.ncbi.nlm.nih.gov/24326875/).
4. Yu H, Cowling BJ, Feng L, Lau EH, Liao Q, Tsang TK, et al. Human infection with avian influenza A H7N9 virus: an assessment of clinical severity. *Lancet.*2013; 382(9887): 138–45. doi: [10.1016/S0140-6736\(13\)61207-6](https://doi.org/10.1016/S0140-6736(13)61207-6) PMID: [23803487](https://pubmed.ncbi.nlm.nih.gov/23803487/).
5. To KK, Chan JF, Chen H, Li L, Yuen KY. The emergence of influenza A H7N9 in human beings 16 years after influenza A H5N1: a tale of two cities. *Lancet Infect Dis.*2013; 13(9): 809–21. doi: [10.1016/S1473-3099\(13\)70167-1](https://doi.org/10.1016/S1473-3099(13)70167-1) PMID: [23969217](https://pubmed.ncbi.nlm.nih.gov/23969217/).
6. Zeng H, Belser JA, Goldsmith CS, Gustin KM, Veguilla V, Katz JM, et al. A(H7N9) virus results in early induction of proinflammatory cytokine responses in both human lung epithelial and endothelial cells and shows increased human adaptation compared with avian H5N1 virus. *J Virol.*2015; 89(8): 4655–67. doi: [10.1128/JVI.03095-14](https://doi.org/10.1128/JVI.03095-14) PMID: [25673714](https://pubmed.ncbi.nlm.nih.gov/25673714/).
7. Li Q, Zhou L, Zhou M, Chen Z, Li F, Wu H, et al. Epidemiology of human infections with avian influenza A(H7N9) virus in China. *N Engl J Med.*2014; 370(6): 520–32. doi: [10.1056/NEJMoa1304617](https://doi.org/10.1056/NEJMoa1304617) PMID: [23614499](https://pubmed.ncbi.nlm.nih.gov/23614499/).
8. Sakai K, Ami Y, Tahara M, Kubota T, Anraku M, Abe M, et al. The host protease TMPRSS2 plays a major role in in vivo replication of emerging H7N9 and seasonal influenza viruses. *J Virol.*2014; 88(10): 5608–16. doi: [10.1128/JVI.03677-13](https://doi.org/10.1128/JVI.03677-13) PMID: [24600012](https://pubmed.ncbi.nlm.nih.gov/24600012/).
9. Morrison J, Josset L, Tchitchek N, Chang J, Belser JA, Swayne DE, et al. H7N9 and other pathogenic avian influenza viruses elicit a three-pronged transcriptomic signature that is reminiscent of 1918 influenza virus and is associated with lethal outcome in mice. *J Virol.*2014; 88(18): 10556–68. doi: [10.1128/JVI.00570-14](https://doi.org/10.1128/JVI.00570-14) PMID: [24991006](https://pubmed.ncbi.nlm.nih.gov/24991006/).
10. Arunachalam R. Adaptive evolution of a novel avian-origin influenza A/H7N9 virus. *Genomics.*2014; 104(6 Pt B): 545–53. doi: [10.1016/j.ygeno.2014](https://doi.org/10.1016/j.ygeno.2014) PMID: [25449177](https://pubmed.ncbi.nlm.nih.gov/25449177/).
11. Zhou J, Wang D, Gao R, Zhao B, Song J, Qi X, et al. Biological features of novel avian influenza A (H7N9) virus. *Nature.*2013; 499(7459): 500–3. doi: [10.1038/nature12379](https://doi.org/10.1038/nature12379) PMID: [23823727](https://pubmed.ncbi.nlm.nih.gov/23823727/).
12. Fang S, Zhang K, Wang T, Wang X, Lu X, Peng B, et al. Primary study on the lesions and specific proteins in BEAS-2B cells induced with the 2009 A (H1N1) influenza virus. *Appl Microbiol Biot.*2014; 98(23): 9691–701. doi: [10.1007/s00253-014-5852-y](https://doi.org/10.1007/s00253-014-5852-y) PMID: [24903817](https://pubmed.ncbi.nlm.nih.gov/24903817/).

13. Vester D, Rapp E, Gade D, Genzel Y, Reichl U. Quantitative analysis of cellular proteome alterations in human influenza A virus-infected mammalian cell lines. *Proteomics*.2009; 9(12): 3316–27. doi: [10.1002/pmic.200800893](https://doi.org/10.1002/pmic.200800893) PMID: [19504497](https://pubmed.ncbi.nlm.nih.gov/19504497/).
14. Cheung CY, Chan EY, Krasnoselsky A, Purdy D, Navare AT, Bryan JT, et al. H5N1 virus causes significant perturbations in host proteome very early in influenza virus-infected primary human monocyte-derived macrophages. *J Infect Dis*.2012; 206(5): 640–5. doi: [10.1093/infdis/jis423](https://doi.org/10.1093/infdis/jis423) PMID: [22822004](https://pubmed.ncbi.nlm.nih.gov/22822004/).
15. Simon PF, McCorrister S, Hu P, Chong P, Silaghi A, Westmacott G, et al. Highly pathogenic H5N1 and novel H7N9 influenza A viruses induce more profound proteomic host responses than seasonal and pandemic H1N1 strains. *J Proteome Res*.2015; 14(11):4511–23. doi: [10.1021/acs.jproteome.5b00196](https://doi.org/10.1021/acs.jproteome.5b00196) PMID: [26381135](https://pubmed.ncbi.nlm.nih.gov/26381135/).
16. Wodal W, Schwendinger MG, Savidis-Dacho H, Crowe BA, Hohenadl C, Fritz R, et al. Immunogenicity and protective efficacy of a vero cell culture-derived whole-virus H7N9 vaccine in mice and guinea pigs. *PLoS One*.2015; 10(2): e113963. doi: [10.1371/journal.pone.0113963](https://doi.org/10.1371/journal.pone.0113963) PMID: [25719901](https://pubmed.ncbi.nlm.nih.gov/25719901/).
17. Watanabe T, Kiso M, Fukuyama S, Nakajima N, Imai M, Yamada S, et al. Characterization of H7N9 influenza A viruses isolated from humans. *Nature*.2013; 501 (7468):551–5. doi: [10.1038/nature12392](https://doi.org/10.1038/nature12392) PMID: [23842494](https://pubmed.ncbi.nlm.nih.gov/23842494/).
18. Yamayoshi S, Fukuyama S, Yamada S, Zhao D, Murakami S, Uraki R, et al. Amino acids substitutions in the PB2 protein of H7N9 influenza A viruses are important for virulence in mammalian hosts. *Sci Rep*.2015; 5: 8039. doi: [10.1038/srep08039](https://doi.org/10.1038/srep08039) PMID: [25623817](https://pubmed.ncbi.nlm.nih.gov/25623817/).
19. Tjoelker LW, Wilder C, Eberhardt C, Stafforini DM, Dietsch G, Schimpf B, et al. Anti-inflammatory properties of a platelet-activating factor acetylhydrolase. *Nature*.1995; 374(6522):549–53. PMID: [7700381](https://pubmed.ncbi.nlm.nih.gov/7700381/).
20. Shafaghat F, Abbasi-Kenarsari H, Majidi J, Movassaghpour AA, Shanehbandi D, Kazemi T. Preparation of proper immunogen by cloning and stable expression of cDNA coding for human hematopoietic stem cell marker CD34 in NIH-3T3 mouse fibroblast cell line. *Adv Pharm Bull*.2015; 5(1):69–75. doi: [10.5681/ap.b.2015.009](https://doi.org/10.5681/ap.b.2015.009) PMID: [25789221](https://pubmed.ncbi.nlm.nih.gov/25789221/).
21. Hopmann R, Cooper JA, Miller KG. Actin organization, bristle morphology, and viability are affected by actin capping protein mutations in *Drosophila*. *J Cell Biol*.1996; 133(6): 1293–305. PMID: [8682865](https://pubmed.ncbi.nlm.nih.gov/8682865/).
22. Lee SK, Kim Y, Kim S, Lee JH, Cho K, Lee SS, et al. Differential expression of cell surface proteins in human bone marrow mesenchymal stem cells cultured with or without basic fibroblast growth factor containing medium. *Proteomics*.2009; 9(18): 4389–405. doi: [10.1002/pmic.200900165](https://doi.org/10.1002/pmic.200900165) PMID: [19655310](https://pubmed.ncbi.nlm.nih.gov/19655310/).
23. Matsuo K, Xiang Y, Nakamura H, Masuko K, Yudoh K, Noyori K, et al. Identification of novel citrullinated autoantigens of synovium in rheumatoid arthritis using a proteomic approach. *Arthritis Res Ther*.2006; 8(6): R175. PMID: [17125526](https://pubmed.ncbi.nlm.nih.gov/17125526/).
24. Hug C, Jay PY, Reddy I, McNally JG, Bridgman PC, Elson EL, et al. Capping protein levels influence actin assembly and cell motility in *dictyostelium*. *Cell*.1995; 81(4): 591–600. PMID: [7758113](https://pubmed.ncbi.nlm.nih.gov/7758113/).
25. Delalle I, Pflieger CM, Buff E, Lueras P, Hariharan IK. Mutations in the *Drosophila* orthologs of the F-actin capping protein alpha-and beta-subunits cause actin accumulation and subsequent retinal degeneration. *Genetics*.2005; 171(4): 1757–65. PMID: [16143599](https://pubmed.ncbi.nlm.nih.gov/16143599/).
26. Doimo M, Desbats MA, Baldoin MC, Lenzini E, Basso G, Murphy E, et al. Functional analysis of missense mutations of OAT, causing gyrate atrophy of choroid and retina. *Hum Mutat*.2013; 34(1): 229–36. doi: [10.1002/humu.22233](https://doi.org/10.1002/humu.22233) PMID: [23076989](https://pubmed.ncbi.nlm.nih.gov/23076989/).
27. Juncosa JI, Lee H, Silverman RB. Two continuous coupled assays for ornithine- $\delta$ -aminotransferase. *Anal Biochem*.2013; 440(2):145–9. doi: [10.1016/j.ab.2013.05.025](https://doi.org/10.1016/j.ab.2013.05.025) PMID: [23747282](https://pubmed.ncbi.nlm.nih.gov/23747282/).
28. Hampel A, Huber C, Geffers R, Spona-Friedl M, Eisenreich W, Bange FC. *Mycobacterium tuberculosis* is a natural ornithine aminotransferase (*rocD*) mutant and depends on *Rv2323c* for growth on arginine. *PLoS One*.2015; 10(9): e136914. doi: [10.1371/journal.pone.0136914](https://doi.org/10.1371/journal.pone.0136914) PMID: [26368558](https://pubmed.ncbi.nlm.nih.gov/26368558/).
29. Da Rocha IMA, Vitorello VA, Silva JS, Ferreira-Silva SL, Viégas RA, Silva EN, et al. Exogenous ornithine is an effective precursor and the  $\delta$ -ornithine amino transferase pathway contributes to proline accumulation under high N recycling in salt-stressed cashew leaves. *J Plant Physiol*.2012; 169(1): 41–9. doi: [10.1016/j.jplph.2011.08.001](https://doi.org/10.1016/j.jplph.2011.08.001) PMID: [21903295](https://pubmed.ncbi.nlm.nih.gov/21903295/).
30. Funck D, Stadelhofer B, Koch W. Ornithine- $\delta$ -aminotransferase is essential for arginine catabolism but not for proline biosynthesis. *BMC Plant Biol*.2008; 8: 40. doi: [10.1186/1471-2229-8-40](https://doi.org/10.1186/1471-2229-8-40) PMID: [18419821](https://pubmed.ncbi.nlm.nih.gov/18419821/).
31. Wagemaker MJ, Eastwood DC, Welagen J, van der Drift C, Jetten MS, Burton K, et al. The role of ornithine aminotransferase in fruiting body formation of the mushroom *Agaricus bisporus*. *Mycol Res*.2007; 111(Pt 8):909–18. PMID: [17703933](https://pubmed.ncbi.nlm.nih.gov/17703933/).



32. Wang G, Shang L, Burgett AW, Harran PG, Wang X. Diazonamide toxins reveal an unexpected function for ornithine delta-amino transferase in mitotic cell division. *Proc Natl Acad Sci U S A*.2007; 104(7): 2068–73. PMID: [17287350](#).
33. Wagener R, Aukema SM, Schlesner M, Haake A, Burkhardt B, Claviez A, et al. The PCBP1 gene encoding poly(rC) binding protein I is recurrently mutated in Burkitt lymphoma. *Genes Chromosomes Cancer*.2015; 54(9): 555–64. doi: [10.1002/gcc.22268](#) PMID: [26173642](#).
34. Huo LR, Liang JT, Zou JH, Wang LY, Li Q, Wang XM. Possible novel roles of poly(rC)-binding protein 1 in SH-SY5Y neurocytes: an analysis using a dynamic Bayesian network. *Neurosci Bull*.2012; 28(3): 282–90. doi: [10.1007/s12264-012-1242-6](#) PMID: [22622828](#).
35. Huo LR, Ju W, Yan M, Zou JH, Yan W, He B, et al. Identification of differentially expressed transcripts and translants targeted by knock-down of endogenous PCBP1. *Biochim Biophys Acta*.2010; 1804(10): 1954–64. doi: [10.1016/j.bbapap.2010.07.002](#) PMID: [20624489](#).
36. Shi Z, Zhang T, Long W, Wang X, Zhang X, Ling X, et al. Down-regulation of Poly(rC)-binding protein 1 correlates with the malignant transformation of hydatidiform moles. *Int J Gynecol Cancer*.2012; 22(7): 1125–9. doi: [10.1097/IGC.0b013e3182606ac3](#) PMID: [22801034](#).
37. Huo LR, Zhong N. Identification of transcripts and translants targeted by overexpressed PCBP1. *Biochim Biophys Acta*.2008; 1784(11): 1524–33. doi: [10.1016/j.bbapap.2008.06.017](#) PMID: [18656558](#).
38. Lee SB, Park JH, Kaevel J, Sramkova M, Weigert R, Park MH. The effect of hypusine modification on the intracellular localization of eIF5A. *Biochem Biophys Res Commun*.2009; 383(4): 497–502. doi: [10.1016/j.bbrc.2009.04.049](#) PMID: [19379712](#).
39. Lu Z, Song Q, Yang J, Zhao X, Zhang X, Yang P, et al. Comparative proteomic analysis of anti-cancer mechanism by periplocin treatment in lung cancer cells. *Cell Physiol Biochem*.2014; 33(3): 859–68. doi: [10.1159/000358658](#) PMID: [24685647](#).
40. Bevec D, Jaksche H, Oft M, Wohl T, Himmelspach M, Pacher A, et al. Inhibition of HIV-1 replication in lymphocytes by mutants of the Rev cofactor eIF-5A. *Science*.1996; 271(5257):1858–60. PMID: [8596953](#).
41. Cracchiolo BM, Heller DS, Clement PMJ, Wolff EC, Park M, Hanauske-Abel HM. Eukaryotic initiation factor 5A-1 (eIF5A-1) as a diagnostic marker for aberrant proliferation in intraepithelial neoplasia of the vulva. *Gynecol Oncol*.2004; 94(1): 217–22. PMID: [15262146](#).
42. Maier B, Ogihara T, Trace AP, Tersey SA, Robbins RD, Chakrabarti SK, et al. The unique hypusine modification of eIF5A promotes islet beta cell inflammation and dysfunction in mice. *J Clin Invest*.2010; 120(6): 2156–70. doi: [10.1172/JCI38924](#) PMID: [20501948](#).
43. Zanelli CF, Valentini SR. Is there a role for eIF5A in translation? *Amino Acids*.2007; 33(2): 351–8. PMID: [17578650](#).
44. Hwang H, Moon P, Lee J, Kim J, Lee W, Ryu SH, et al. Identification of the target proteins of rosiglitazone in 3T3-L1 adipocytes through proteomic analysis of cytosolic and secreted proteins. *Mol Cells*.2011; 31(3): 239–46. doi: [10.1007/s10059-011-0026-6](#) PMID: [21347706](#).
45. Tjoelker LW, Stafforini DM. Platelet-activating factor acetylhydrolases in health and disease. *Biochim Biophys Acta*.2000; 1488(1–2):102–23. PMID: [11080681](#).
46. Manya H, Aoki J, Watanabe M, Adachi T, Asou H, Inoue Y, et al. Switching of platelet-activating factor acetylhydrolase catalytic subunits in developing rat brain. *J Biol Chem*.1998; 273(29): 18567–72. PMID: [9660828](#).
47. Riera J, Rodríguez R, Carcedo MT, Campa VM, Ramos S, Lazo PS. Isolation and characterization of nudC from mouse macrophages, a gene implicated in the inflammatory response through the regulation of PAF-AH(I) activity. *FEBS Lett*.2007; 581(16): 3057–62. PMID: [17555748](#).
48. Manya H, Aoki J, Kato H, Ishii J, Hino S, Arai H, et al. Biochemical characterization of various catalytic complexes of the brain platelet-activating factor acetylhydrolase. *J Biol Chem*.1999; 274(45): 31827–32. PMID: [10542206](#).
49. Livnat I, Finkelshtein D, Ghosh I, Arai H, Reiner O. PAF-AH catalytic subunits modulate the Wnt pathway in developing GABAergic neurons. *Front Cell Neurosci*.2010; 4 pii: 19. doi: [10.3389/fncel.2010.00019](#) PMID: [20725507](#).
50. Snyder F. Platelet-activating factor and its analogs: metabolic pathways and related intracellular processes. *Biochim Biophys Acta*.1995; 1254(3): 231–49. PMID: [7857964](#).
